# Supplementary material for: Controllable fabrication of a N and B co-doped carbon shell on the surface of TiO2 as a support for boosting the electrochemical performances
Source: Royal Society of Chemistry journal article supplement (doi:10.1039/c6ta09239j), 2016-12-12
Supplement: c6ta09239j1.pdf [file c6ta09239j1.pdf]

## Supporting Information

### Controllable Fabrication of N and B Co-Doped Carbon Shell on the Surface of TiO<sub>2</sub> as a Support for Boosting the Electrochemical Performances

Ying Chang, Conghui Yuan, Yuntong Li, Cheng Liu, Tong Wu, Birong Zeng, Yiting Xu, and Lizong Dai \*

Fujian Provincial Key Laboratory of Fire Retardant Materials, College of Materials, Xiamen University, Xiamen, 361005, China.

E-mail: \*lzdai@xmu.edu.cn

#### Synthesis of TAC and TAB

**Synthesis of TAC:** Tris(4-aminophenyl)amine (1.0 mmol, 0.29 g) and a catalytic amount of concentrated HCl solution were dissolved in a solution containing 16.0 mL of anhydrous ethanol and 8.0 mL of dichloromethane. To this solution, 3,4-dihydroxybenzaldehyde (3.1 mmol, 0.428 g) in 6.0 mL of anhydrous ethanol solution was added. The reaction mixture was stirred at room temperature for 12 h under an Ar atmosphere and protected from light. Then, the reaction mixture was concentrated into ~10.0 mL. The resultant orange precipitate was collected by filtration, washed with cold ethanol and dried in vacuum. Yield: 83 %. <sup>1</sup>H NMR (400 MHz, DMSO-D<sub>6</sub>) δ (ppm): 9.70 (s, 3H), 9.55 (s, 3H), 8.61 (s, 3H), 7.39 (d, 3H), 7.21 (d, 6H), 7.16 (d, 3H), 7.05 (d, 6H), 6.83 (d, 3H). <sup>13</sup>C NMR (400 MHz, DMSO-D<sub>6</sub>): 159.23, 149.51, 147.11, 146.09, 145.34, 124.67, 122.80, 122.67, 122.36, 115.93, 114.54. ESI/MS m/z 649.78 [M-H]<sup>-</sup> (expected m/z= 649.69).

**Synthesis of TAB:** To a solution containing 16.0 mL of anhydrous ethanol, 8.0 mL of dichloromethane, Tris(4-aminophenyl)amine (1.0 mmol, 0.29 g) and a catalytic amount of concentrated HCl solution, was added 6.0 mL anhydrous ethanol solution of 4-formylphenylboronic acid (3.1 mmol, 0.464 g). After stirring at room temperature for 12 h, the reaction mixture was concentrated into ~5.0 mL. Then dichloromethane (25.0 mL) was added into the solution slowly at 0 °C. The resultant

yellow precipitate was collected by filtration, washed with a cold solvent containing both dichloromethane and ethanol (volume ratio: 5:1) and dried in vacuum. Yield: 81 %.  $^1\text{H}$  NMR (400 MHz,  $\text{DMSO-D}_6$ )  $\delta$  (ppm): 8.68 (s, 3H), 8.19 (s, 6H), 7.95-7.87 (d, 6H; d, 6H), 7.33 (d, 6H), 7.11 (d, 6H).  $^{13}\text{C}$  NMR (400 MHz,  $\text{DMSO-D}_6$ ): 159.71, 146.64, 145.88, 138.01, 134.87, 134.69, 127.89, 124.79, 123.03. ESI/MS  $m/z$  745.32  $[\text{M}+59]^-$  (expected  $m/z=745.15$ ).

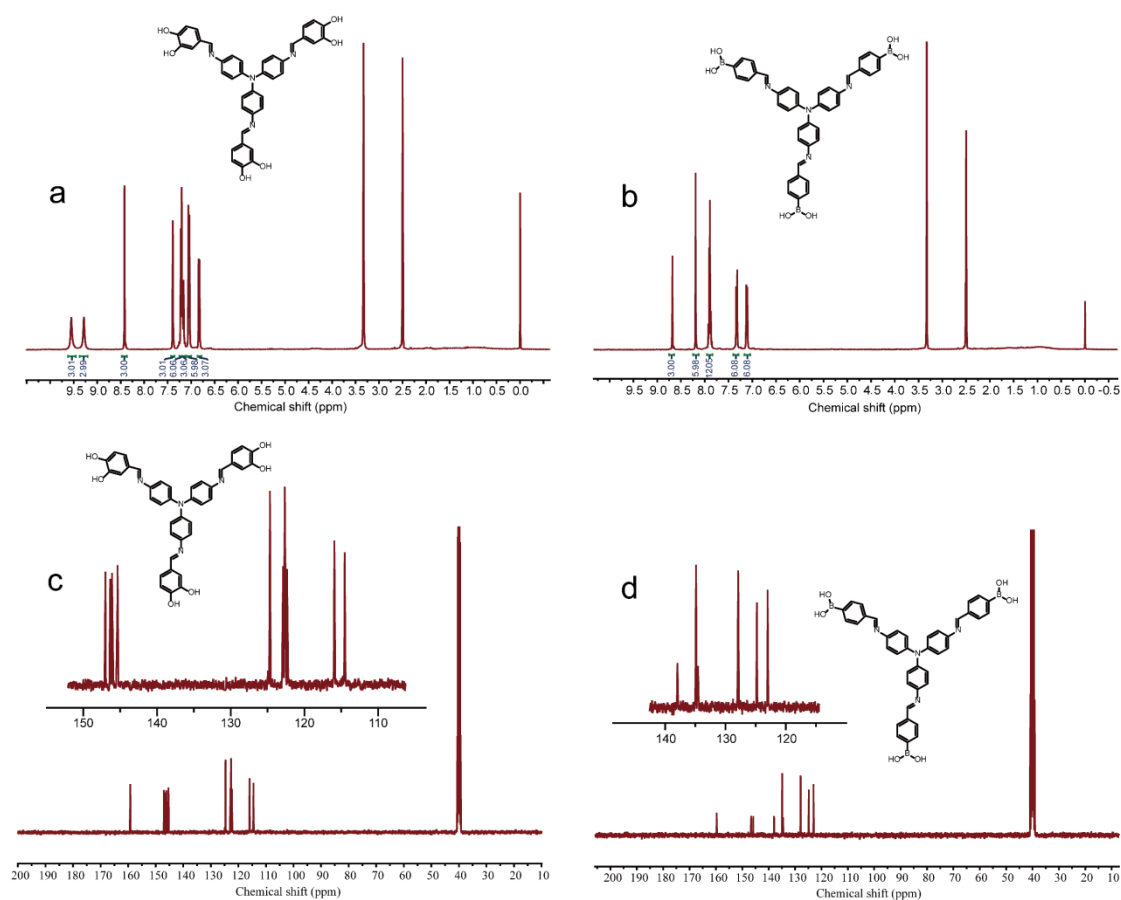

**Fig. S1**  $^1\text{H}$  NMR spectra of (a) TAC and (b) TAB,  $^{13}\text{C}$  NMR spectra of (c) TAC and (d) TAB, solvent:  $\text{DMSO-D}_6$ .

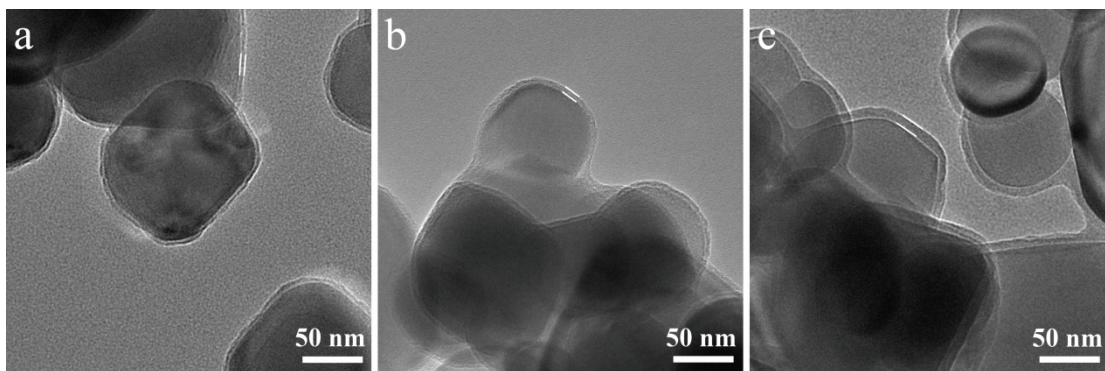

**Fig. S2** TEM images of (a)  $\text{TiO}_2$ @polymer-1, (b)  $\text{TiO}_2$ @polymer-2 and (c)  $\text{TiO}_2$ @polymer-3 nanoparticles.

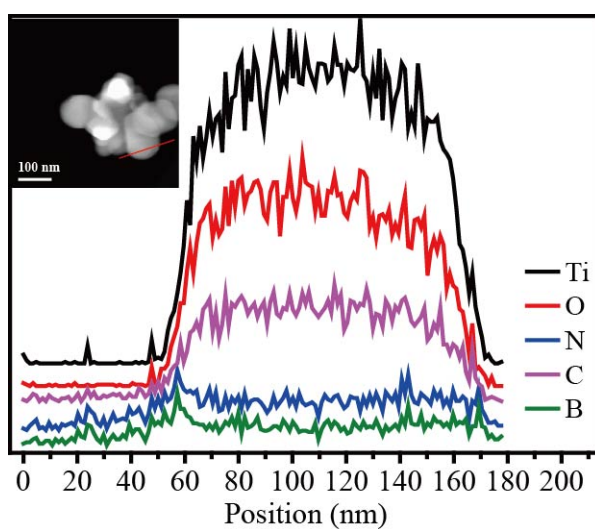

**Fig. S3** The line scanning analyses of C, B, N, Ti and O elements on  $\text{TiO}_2$ @CNB-2 support. The inset is a HADDF-STEM image of  $\text{TiO}_2$ @CNB-2 support.

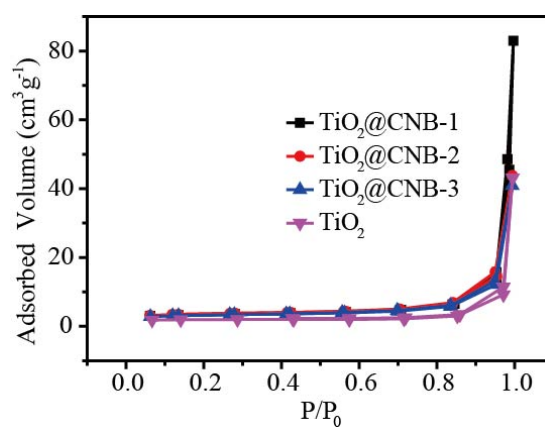

**Fig. S4**  $\text{N}_2$  adsorption and desorption isotherms of  $\text{TiO}_2$ @CNB-1,  $\text{TiO}_2$ @CNB-2,  $\text{TiO}_2$ @CNB-3 and  $\text{TiO}_2$ .

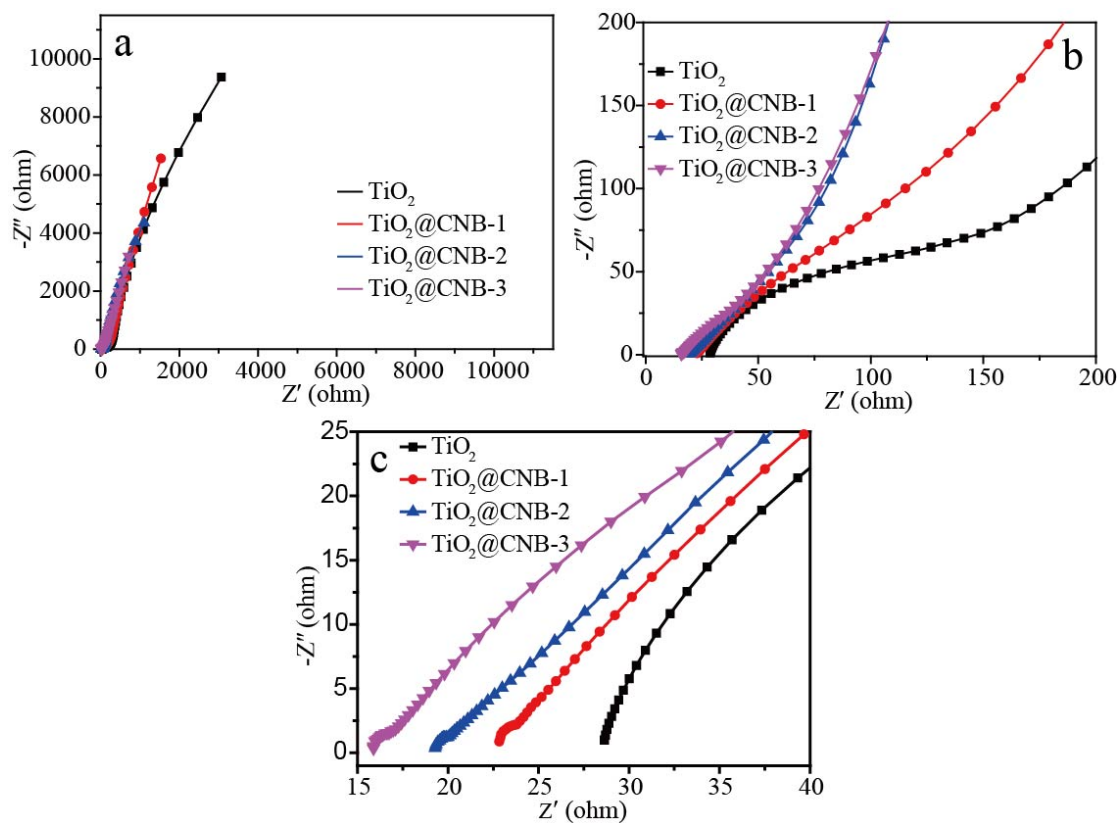

**Fig. S5** Overview Nyquist plots of  $\text{TiO}_2$ ,  $\text{TiO}_2@\text{CNB-1}$ ,  $\text{TiO}_2@\text{CNB-2}$  and  $\text{TiO}_2@\text{CNB-3}$  using an amplitude of 5 mV at a frequency range from 100 KHz to 0.1 Hz (a); (b) and (c) are the magnified version of (a).

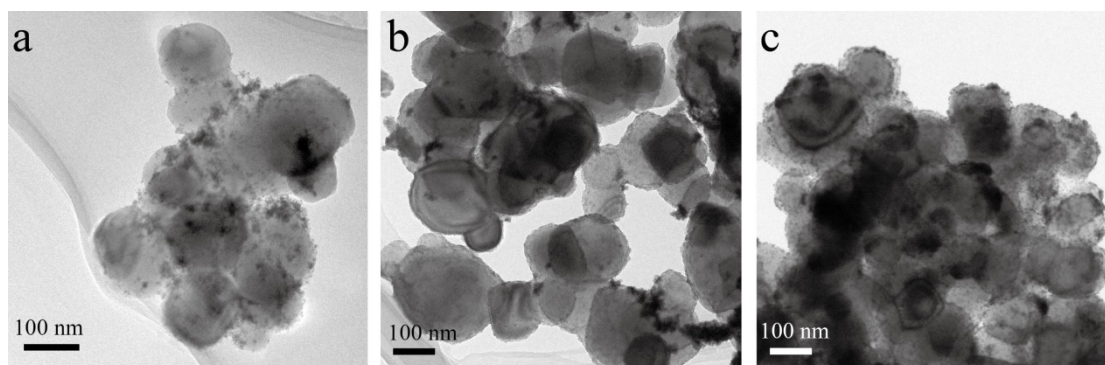

**Fig. S6** TEM images of Pt supported  $\text{TiO}_2@\text{CNB}$  catalysts with various shell thickness: (a)  $\text{Pt}/\text{TiO}_2@\text{CNB-1}$ , (b)  $\text{Pt}/\text{TiO}_2@\text{CNB-2}$  and (c)  $\text{Pt}/\text{TiO}_2@\text{CNB-3}$  catalysts.

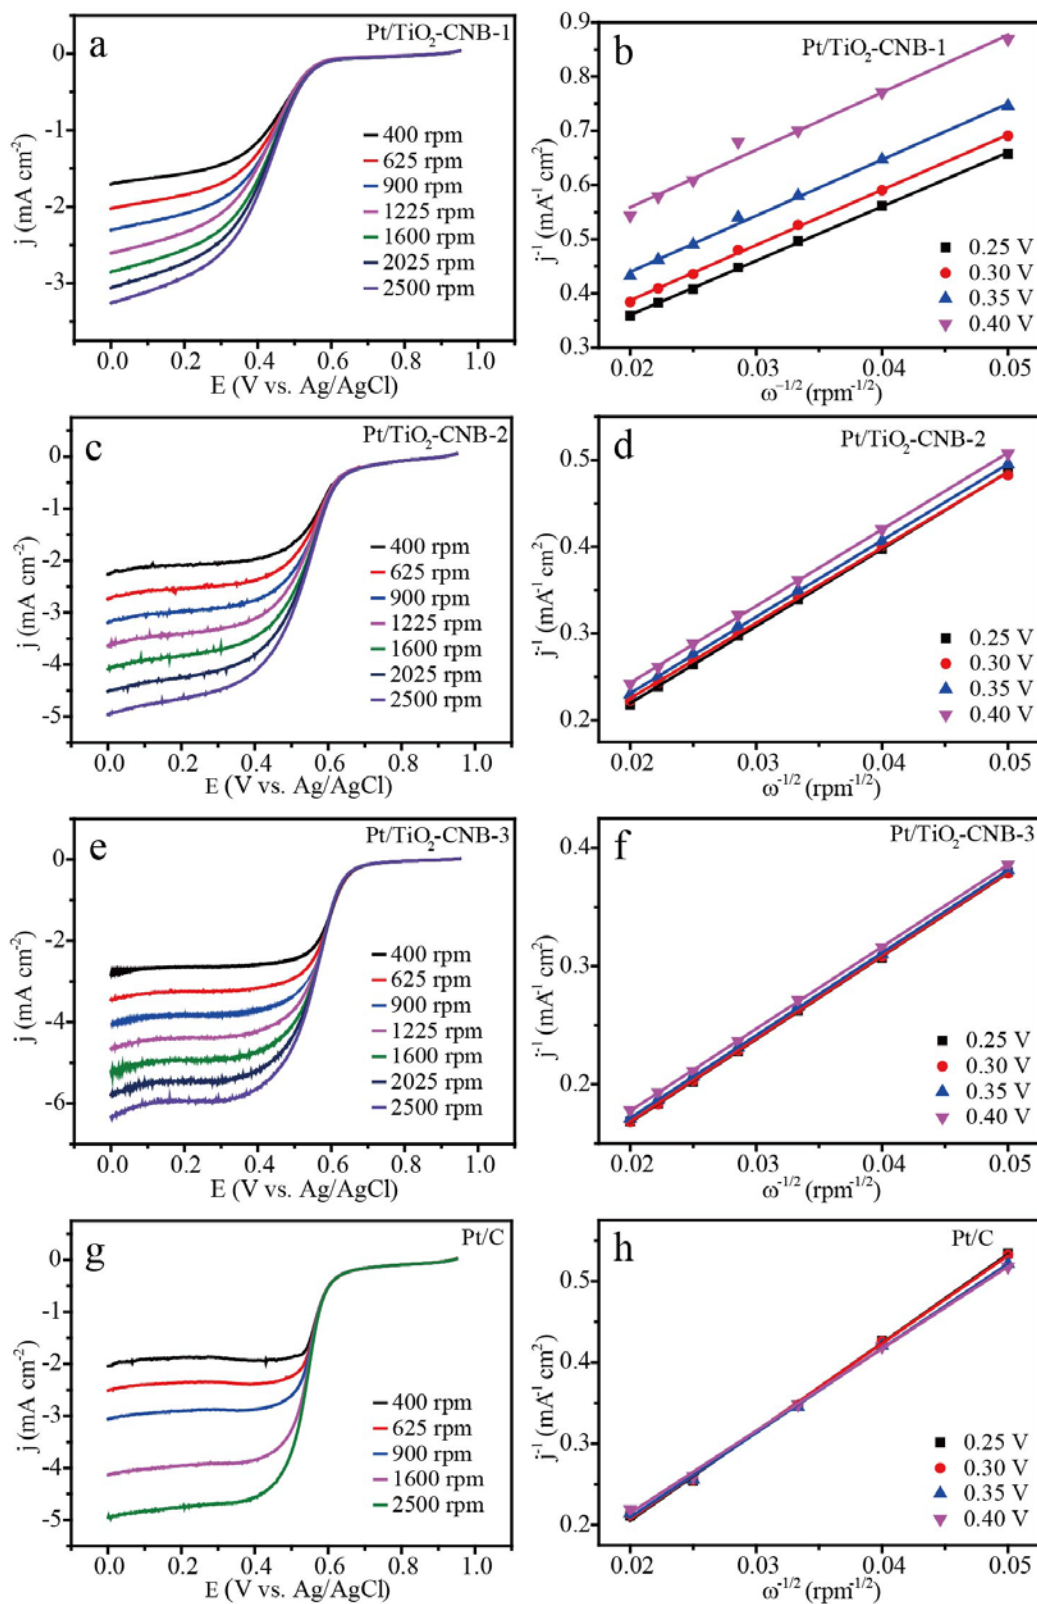

**Fig. S7** LSV curves of (a) Pt/TiO<sub>2</sub>@CNB-1, (c) Pt/TiO<sub>2</sub>@CNB-2, (e) Pt/TiO<sub>2</sub>@CNB-3 and (g) Pt/C at various rotation speeds. (b, d, f and h) the corresponding K-L plots at different potentials.

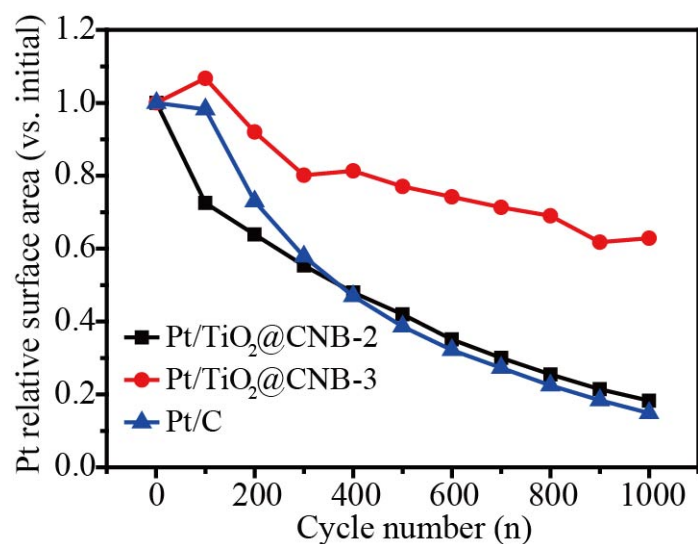

**Fig. S8** Changes of ESA for Pt/TiO<sub>2</sub>@CNB-2, Pt/TiO<sub>2</sub>@CNB-3 and Pt/C catalysts with the increase of cycle number.

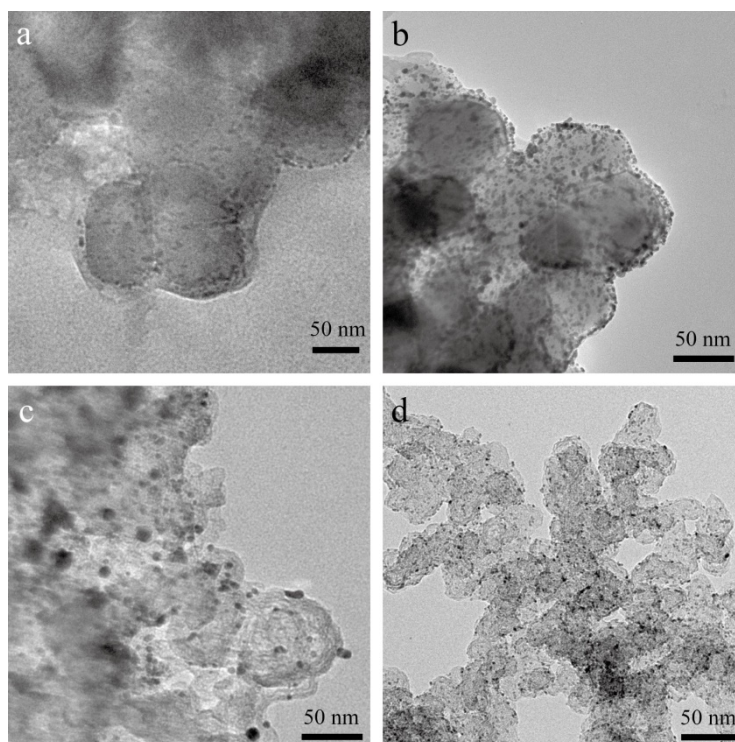

**Fig. S9** TEM images of (a) Pt/TiO<sub>2</sub>@CNB-2, (b) Pt/TiO<sub>2</sub>@CNB-3 and (c) Pt/C catalysts obtained after the CV cycles. (d) showed the TEM image of Pt/C catalyst before the CV cycles.



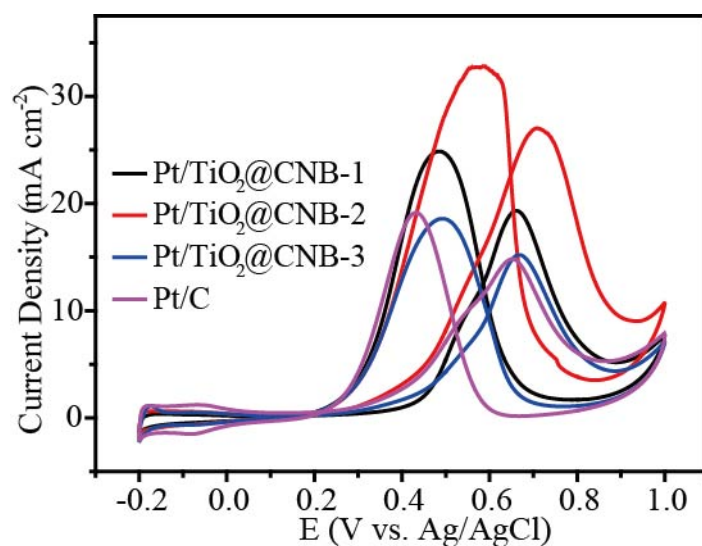

**Fig. S10** CV curves of Pt/C and Pt supported TiO<sub>2</sub>@CNB catalysts with various shell thickness in Ar-saturated 0.5 mol L<sup>-1</sup> CH<sub>3</sub>OH + 0.5 mol L<sup>-1</sup> H<sub>2</sub>SO<sub>4</sub> solution with a scan rate of 50 mV s<sup>-1</sup>: area activity.

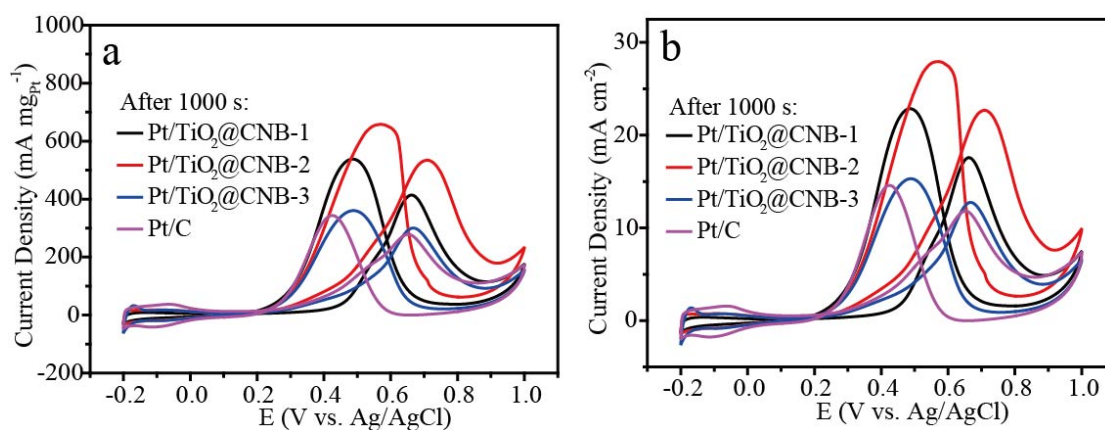

**Fig. S11** CV curves of Pt/C and Pt supported TiO<sub>2</sub>@CNB catalysts with various shell thickness after 1000 s in Ar-saturated 0.5 mol L<sup>-1</sup> CH<sub>3</sub>OH + 0.5 mol L<sup>-1</sup> H<sub>2</sub>SO<sub>4</sub> solution with a scan rate of 50 mV s<sup>-1</sup>: (a) mass activity, (b) area activity.
